# Supplementary material for: Edible temperature-responsive-adhesive thermogalvanic hydrogel for self-powered multi-sited fatigue monitoring
Source: Royal Society of Chemistry journal article supplement (doi:10.1039/d4tc01418a), 2024-01-01
Supplement: d4tc01418a1.pdf [file d4tc01418a1.pdf]

## Supplementary Information

### **Edible Temperature-Responsive-Adhesive Thermogalvanic Hydrogel for Self-Powered Multi-Sited Fatigue Monitoring**

Xinru Zhang<sup>a</sup>, Ning Li<sup>a</sup>, Xiaojing Cui<sup>b,c,\*</sup>, Yu Li<sup>a</sup>, Zhaosu Wang<sup>a</sup>, Kai Zhuo<sup>a</sup>, Hulin Zhang<sup>a,\*</sup>

<sup>a</sup>College of Electronic Information and Optical Engineering, Taiyuan University of Technology, Taiyuan, 030024, China

<sup>b</sup>Shanxi Transportation Technology Research & Development Co., Ltd., Taiyuan 030032, China

<sup>c</sup>School of Physics and Information Engineering, Shanxi Normal University, Taiyuan 030031, China

\*To whom correspondence should be addressed: 20210084@sxnu.edu.cn (X.C.); zhanghulin@tyut.edu.cn (H.Z.)

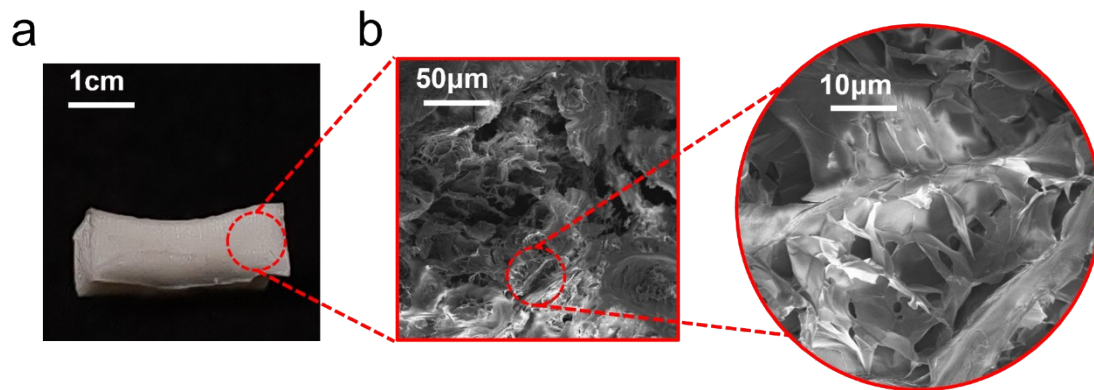

**Fig. S1** (a) Photo of the freeze-dried Gel/GL hydrogel. Scale bar (1 cm). (b) SEM images of the surface captured at various magnifications.

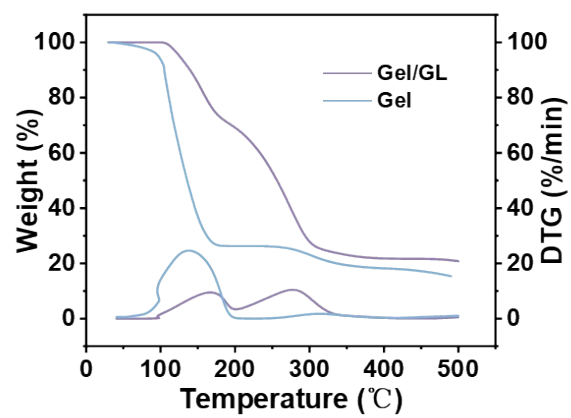

**Fig. S2** TG and DTG curves of the Gel/GL hydrogel.

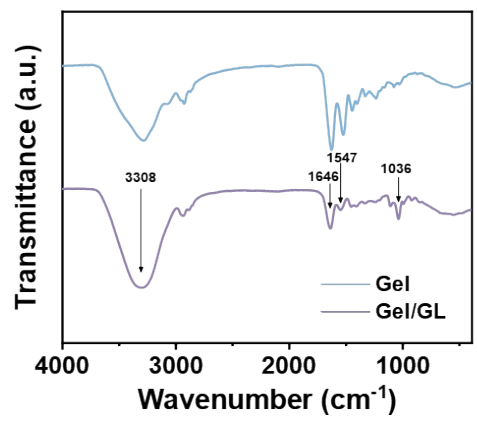

**Fig. S3** FTIR spectra of the Gel/GL hydrogel.

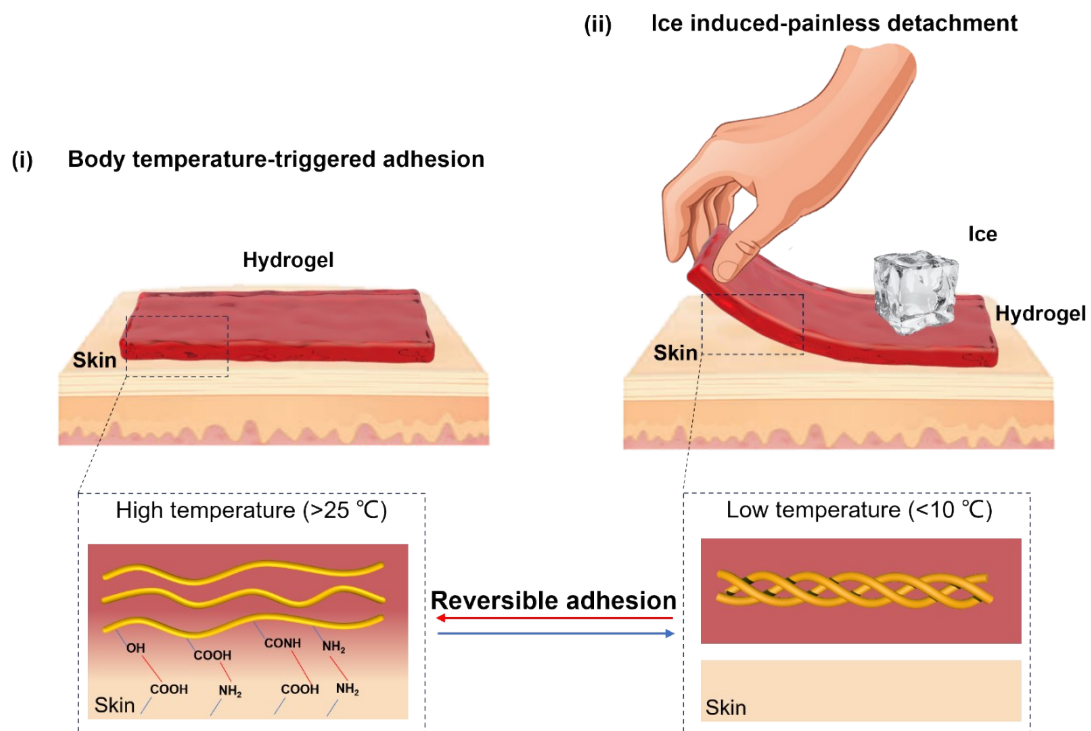

**Fig. S4** Schematic illustrations of the body temperature-triggered gentle adhesion and ice-cooling-induced painless detachment of the Gel/GL hydrogel.

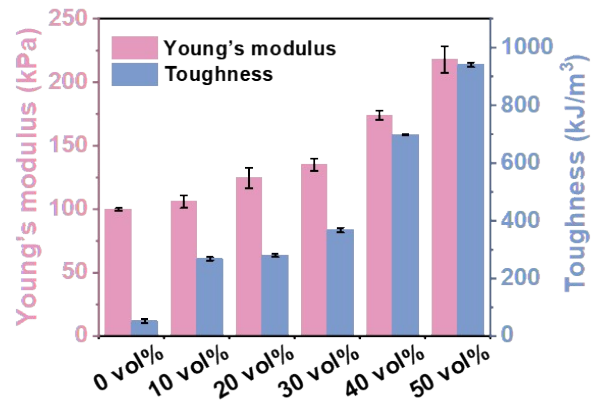

**Fig. S5** Comparison of the Young's modulus and toughness values of the Gel/GL hydrogel with different glycerol volume content.

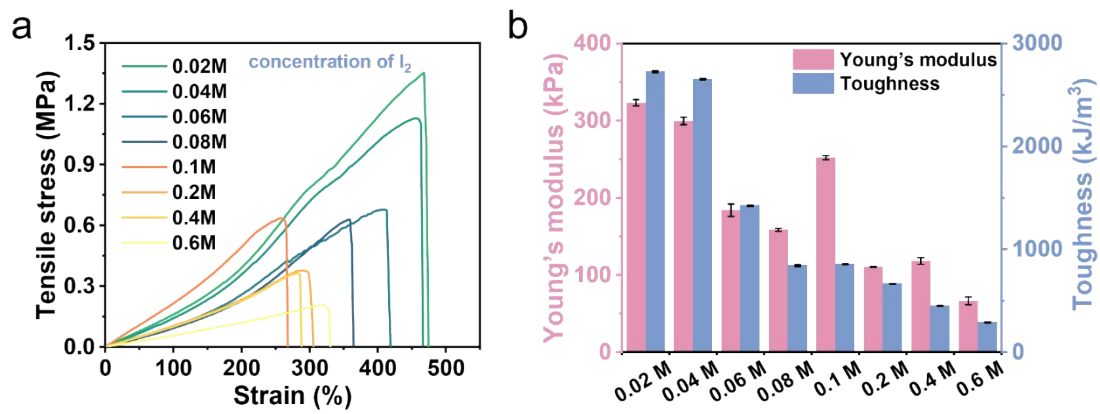

**Fig. S6** (a) The tensile stress-strain curves and (b) comparison of the Young's modulus and toughness values of the Gel/GL hydrogel with different I<sub>2</sub> content.

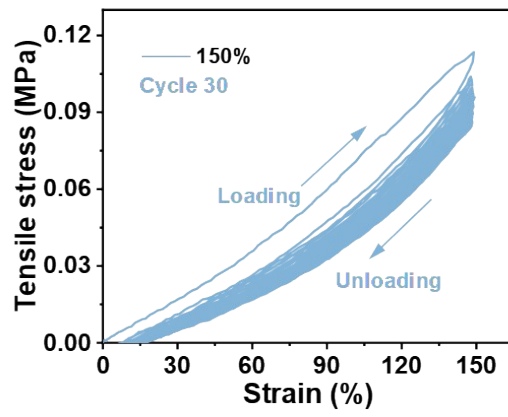

**Fig. S7** Continuous loading and unloading tests at 150% deformation.



|        | 253K                                                                              |                                                                                   | 273K                                                                              |                                                                                    | 298K                                                                                |                                                                                     |
|--------|-----------------------------------------------------------------------------------|-----------------------------------------------------------------------------------|-----------------------------------------------------------------------------------|------------------------------------------------------------------------------------|-------------------------------------------------------------------------------------|-------------------------------------------------------------------------------------|
|        | Initial state                                                                     | Stored for two weeks                                                              | Initial state                                                                     | Stored for two weeks                                                               | Initial state                                                                       | Stored for two weeks                                                                |
| Gel/GL |  |  |  |  |  |  |
| Gel    |  |  |  |  |  |  |

**Fig. S8** Photographs of the initial state of the hydrogel and the photos stored at different temperatures for two weeks. Scale bar (1 cm).

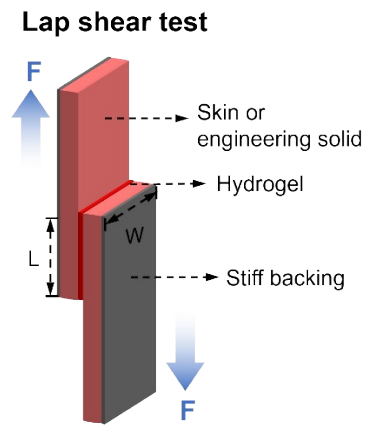

**Fig. S9** Schematic for the measurement of shear strength based on the standard lap shear test.  $F$  force,  $W$  width,  $L$  length.

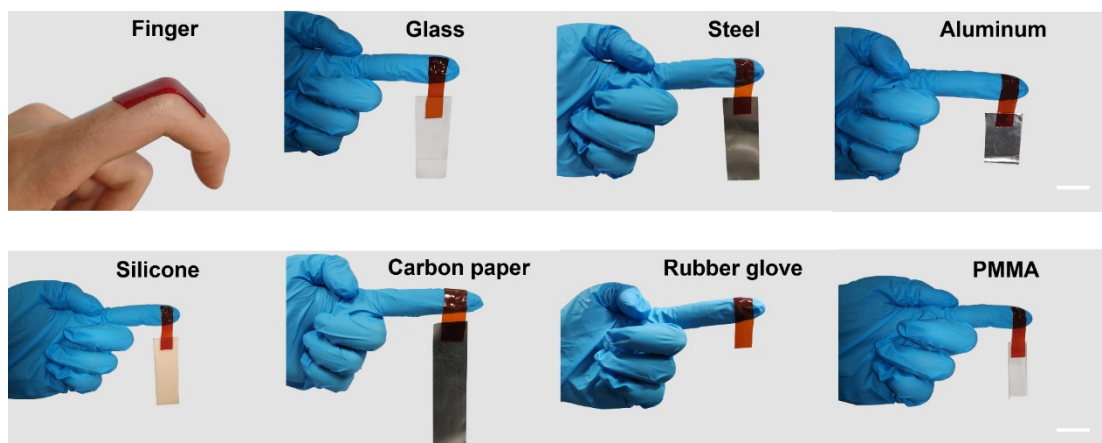

**Fig. S10** Photographs of adhesion of hydrogels to different materials. Scale bar (1 cm).

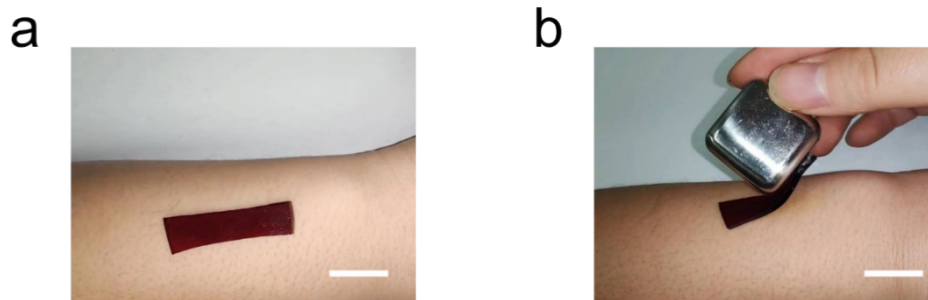

**Fig. S11** (a) Photographs of the hydrogel sticking to the skin and (b) removing after 10 seconds of freezing. Scale bar (1 cm).

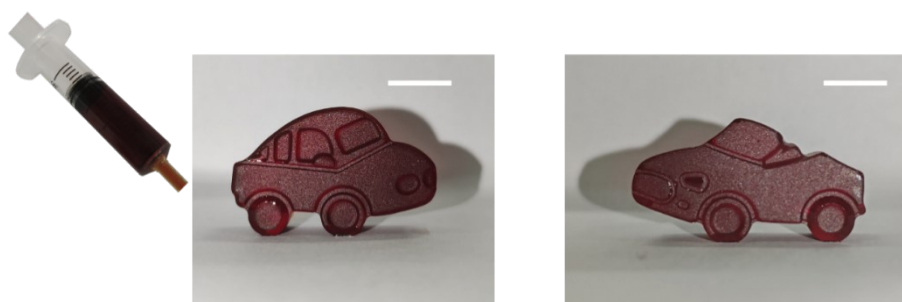

**Fig. S12** Photographs of the remodeling Gel/GL hydrogel with desired car shape.

Scale bar (1 cm).

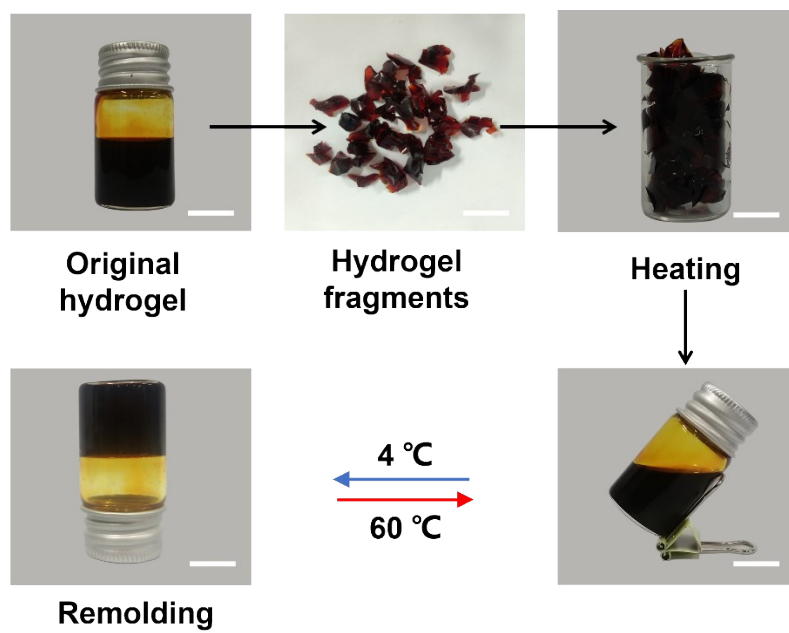

**Fig. S13** Reversible sol-gel transition of the Gel/GL hydrogel. Scale bar (1 cm).

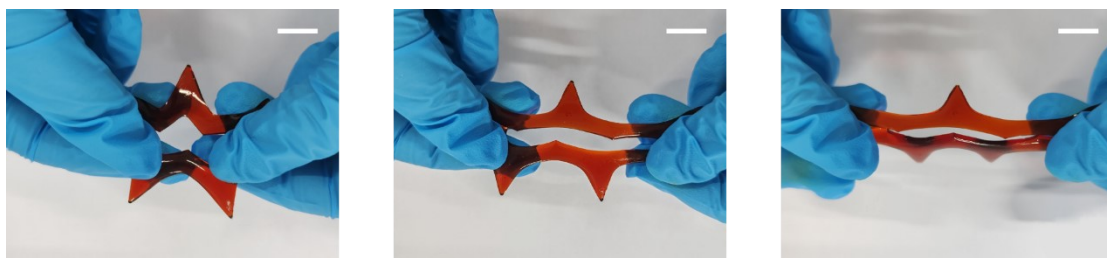

**Fig. S14** Photographs of the large stretching of remolded Gel/GL hydrogel. Scale bar (1 cm).

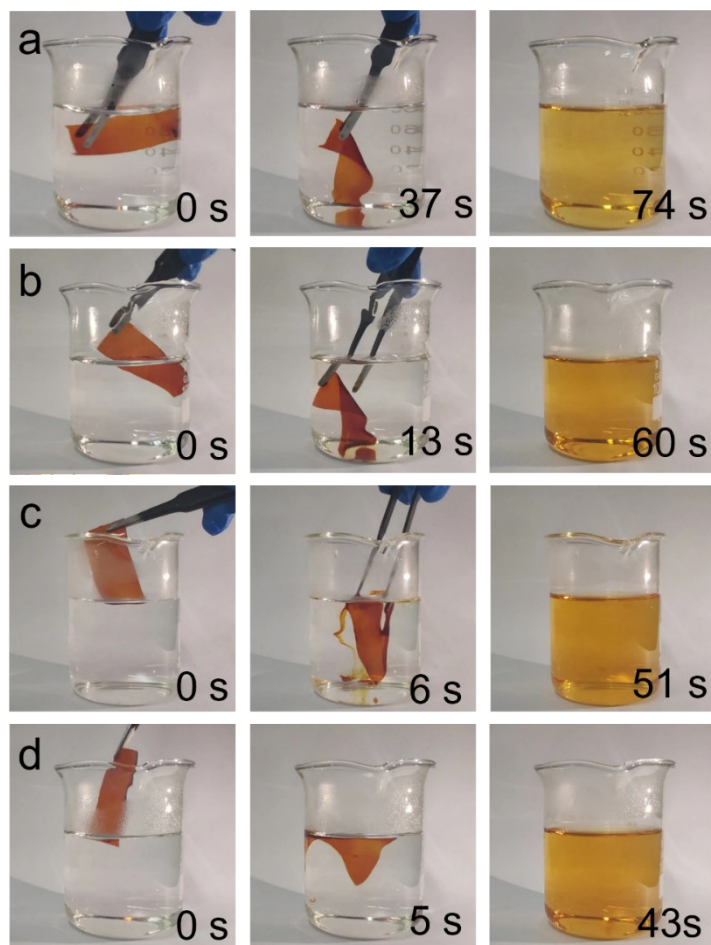

**Fig. S15** The dissolution of the Gel/GL hydrogel at 40 °C (a), 50 °C (b), 60 °C (c) and 70 °C (d). The softening and dissolution times of the hydrogels are 37 s, 13 s, 6 s, 5 s and 74 s, 60 s, 51 s, 43 s at temperatures of 40 °C, 50 °C, 60 °C and 70 °C, respectively. Scale bar (1 cm).



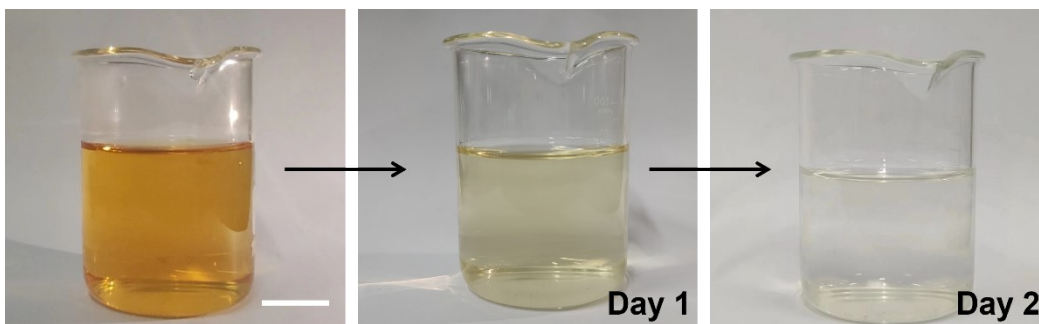

**Fig. S16** The changes of the Gel/GL hydrogel after dissolution stored at room temperature for two days. Scale bar (1 cm).

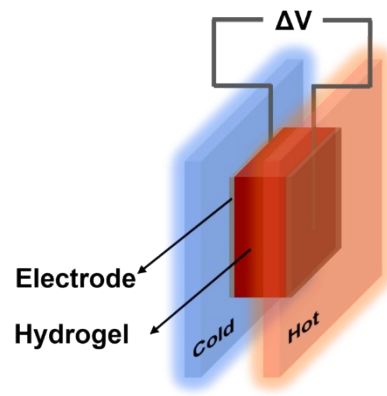

**Fig. S17** Schematic illustration of the Seebeck coefficient measurement setup.

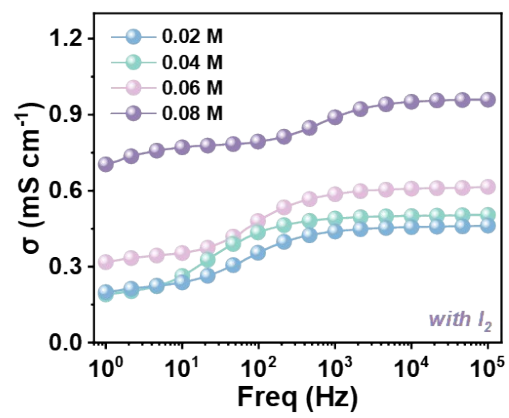

**Fig. S18** Frequency-dependent conductance of hydrogels with different doses of  $I_2$ .

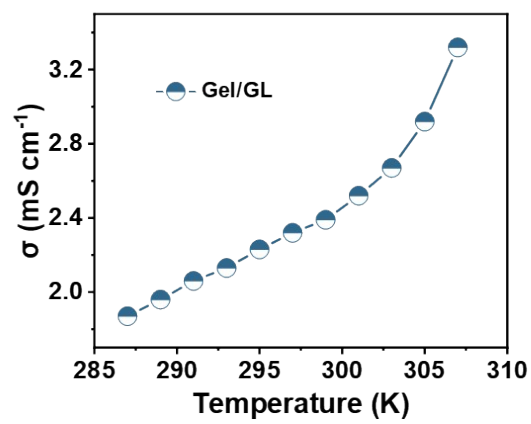

**Fig. S19** Variation of the electrical conductivity at different temperature gradients.

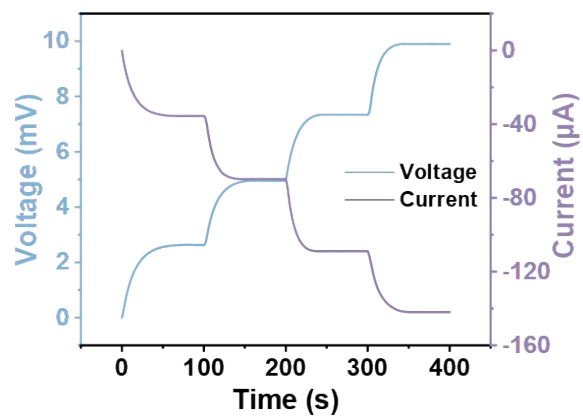

**Fig. S20** Corresponding output voltage and current response of the Gel/GL hydrogel under fixed temperature difference. The cold end is fixed at 273 K, and the temperature difference increment at the hot end is 5 K.

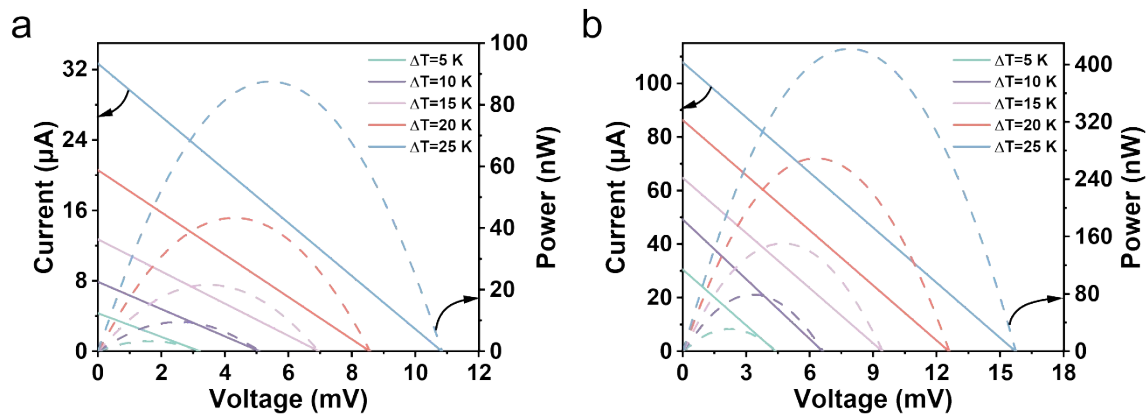

**Fig. S21** Current/power-voltage curves for the Gel/GL hydrogel with solvent/gelatin volume ratio of 4 (a) and 8 (b) at varying  $\Delta T$ .

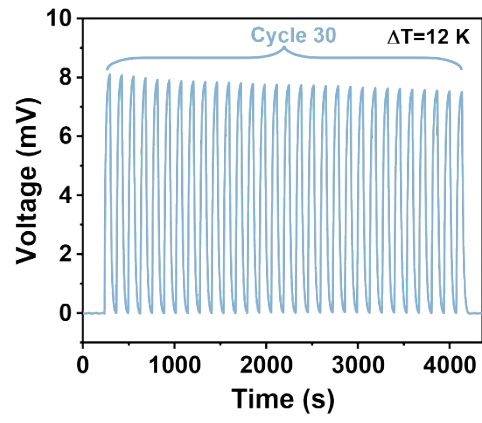

**Fig. S22** Thirty cycles of voltage output at a temperature difference of 12 K.

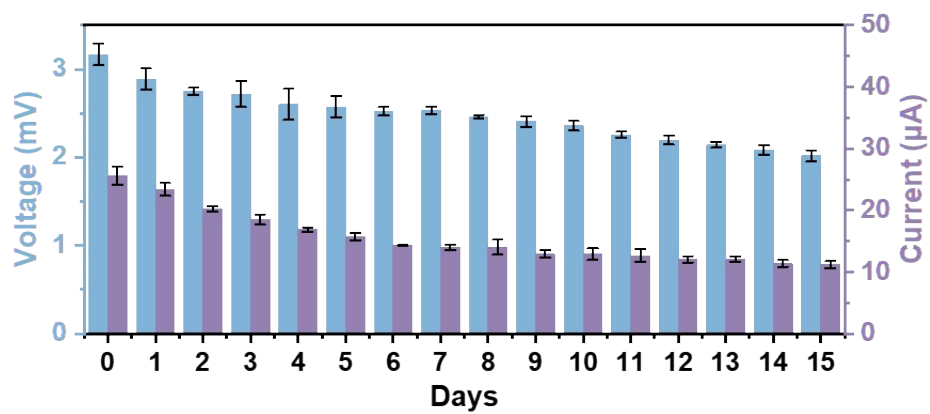

**Fig. S23** The voltage and current during 15 days of dehydration.  $\Delta T = 5$  K.



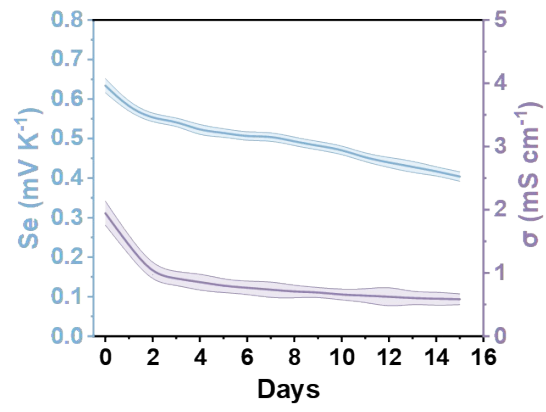

**Fig. S24** Se and  $\sigma$  variations for 15 days of dehydration.

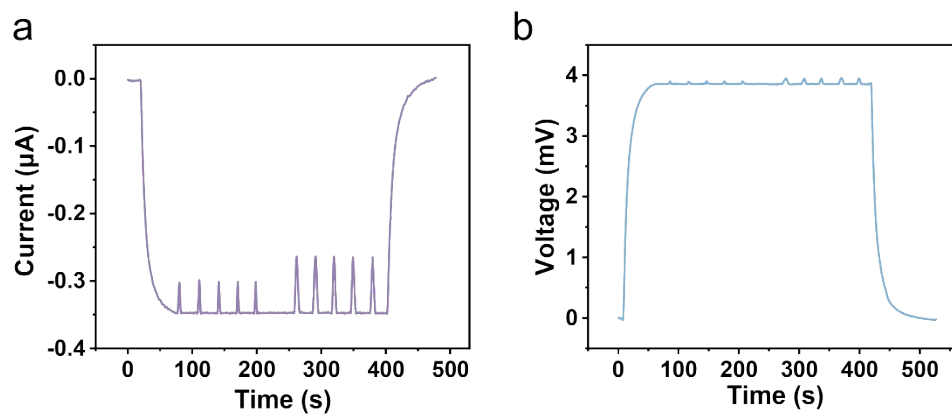

**Fig. S25** (a) Current-time and (b) voltage-time curves of the Gel/GL hydrogel being repeatedly stretched when  $T_c = 293$  K and  $T_h = 298$  K.

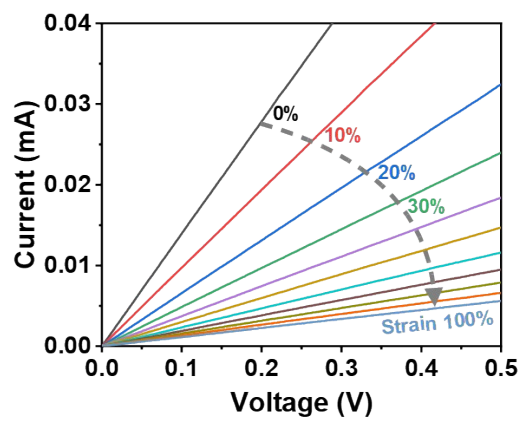

**Fig. S26** The current-voltage curves of the Gel/GL hydrogel at different stretched strains.

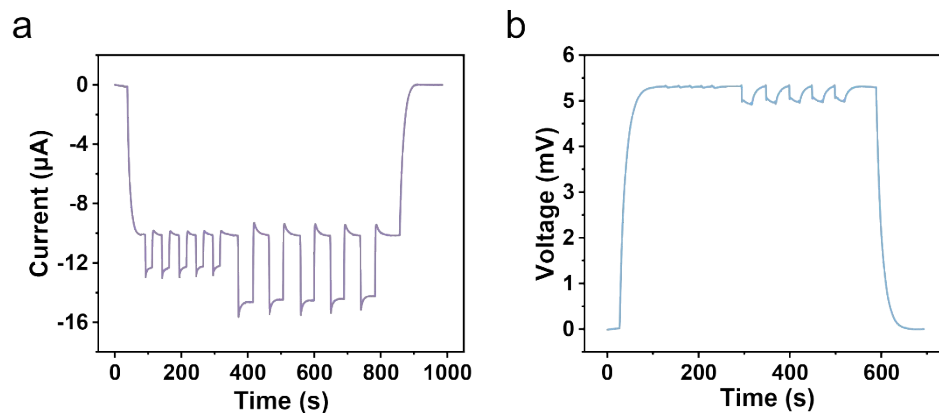

**Fig. S27** (a) Current-time and (b) voltage-time curves of the Gel/GL hydrogel being repeatedly pressed when  $T_c = 293$  K and  $T_h = 298$  K.

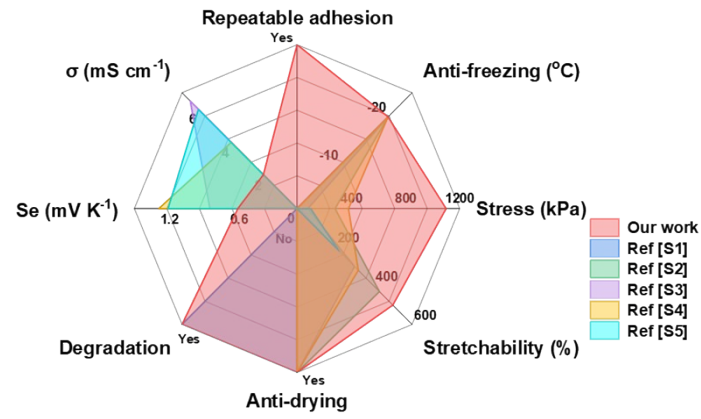

**Fig. S28** Comparison of the Gel/GL hydrogel with existing thermogalvanic gel in terms of the comprehensive performances.

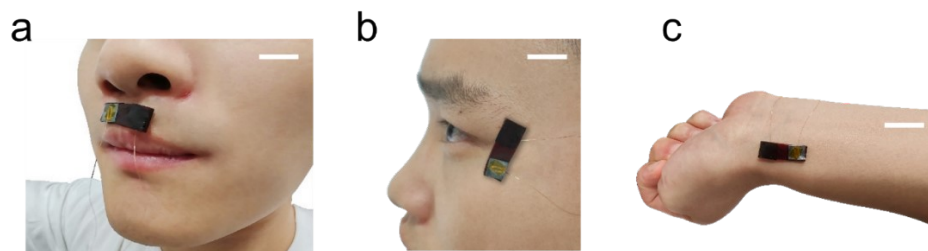

**Fig. S29** Photos of the hydrogel pasted in the corner of (a) the eye, (b) under the nose and (c) near the wrist. Scale bar (1 cm).

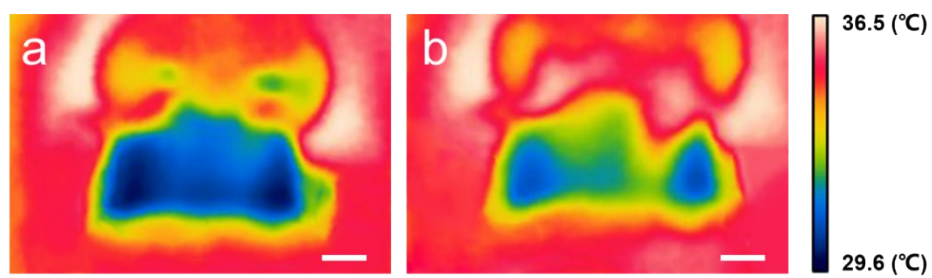

**Fig. S30** (a) The temperature distribution of the Gel/GL hydrogel during exhalation.  
(b) The temperature distribution of the Gel/GL hydrogel during inhalation. Scale bar  
(1 cm).

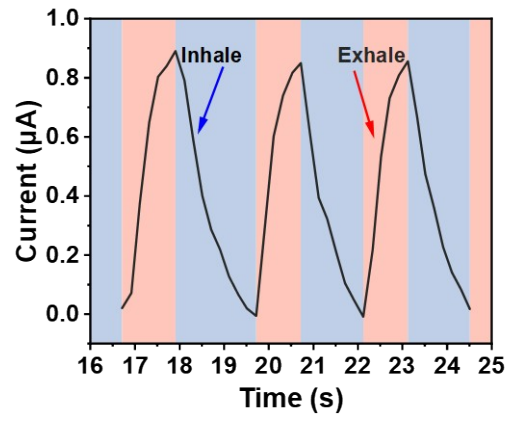

**Fig. S31** The amplified respiratory waveform.



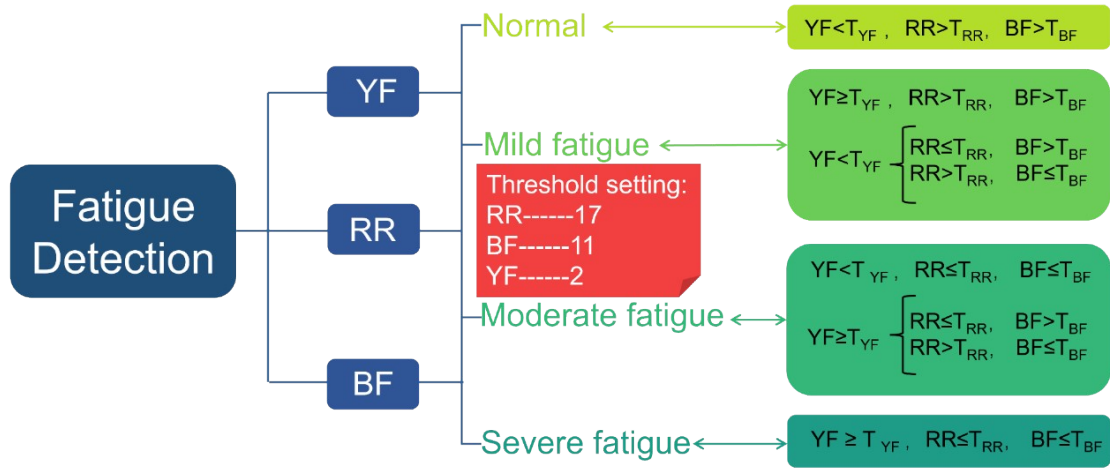

**Fig. S32** Flow chart of fatigue driving judgment.

| <b>Tester</b> | <b>Gender</b> | <b>Age</b> | <b>Weight(kg</b> | <b>Height(cm)</b> |
|---------------|---------------|------------|------------------|-------------------|
| Tester1       | Female        | 22         | 54               | 155               |
| Tester2       | Female        | 23         | 59               | 172               |
| Tester3       | Female        | 24         | 50               | 160               |
| Tester4       | Male          | 23         | 78               | 180               |
| Tester5       | Male          | 24         | 70               | 180               |
| Tester6       | Male          | 26         | 65               | 170               |

Table S1. Information of six volunteers for fatigue detection.

---

|          | <b>N_RR</b> | <b>N_BF</b> | <b>F_RR</b> | <b>F_BF</b> |
|----------|-------------|-------------|-------------|-------------|
| Group 1  | 23          | 18          | 13          | 8           |
| Group 2  | 20          | 15          | 12          | 7           |
| Group 3  | 22          | 14          | 15          | 9           |
| Group 4  | 21          | 15          | 14          | 7           |
| Group 5  | 23          | 13          | 16          | 10          |
| Group 6  | 23          | 12          | 12          | 8           |
| Group 7  | 21          | 18          | 12          | 7           |
| Group 8  | 22          | 17          | 13          | 8           |
| Group 9  | 20          | 16          | 16          | 8           |
| Group 10 | 21          | 16          | 14          | 7           |
| Group 11 | 23          | 18          | 13          | 9           |
| Group 12 | 23          | 17          | 15          | 10          |
| Group 13 | 24          | 19          | 16          | 7           |
| Group 14 | 25          | 20          | 14          | 6           |
| Group 15 | 23          | 20          | 16          | 8           |
| Group 16 | 26          | 18          | 15          | 9           |
| Group 17 | 23          | 19          | 16          | 10          |
| Group 18 | 23          | 17          | 16          | 9           |
| Group 19 | 24          | 16          | 15          | 8           |
| Group 20 | 23          | 15          | 14          | 6           |
| Group 21 | 24          | 13          | 12          | 7           |

---

|          |    |    |    |    |
|----------|----|----|----|----|
| Group 22 | 23 | 12 | 13 | 9  |
| Group 23 | 24 | 15 | 14 | 6  |
| Group 24 | 22 | 18 | 15 | 9  |
| Group 25 | 21 | 18 | 14 | 9  |
| Group 26 | 20 | 13 | 10 | 8  |
| Group 27 | 19 | 18 | 11 | 7  |
| Group 28 | 21 | 16 | 12 | 9  |
| Group 29 | 18 | 13 | 13 | 10 |
| Group 30 | 20 | 12 | 11 | 8  |

---

Table S2. Values of RR and BF under normal and fatigue conditions extracted from 30 groups of waveform data.

Supplemental references:

- [1] H. Song, H. Wang, T. Gan, S. Shi, X. Zhou, Y. Zhang and S. Handschuh-Wang, *Adv. Mater. Technol.*, 2023, 2301483.
- [2] X. Li, X. Xiao, C. Bai, M. Mayer, X. Cui, K. Lin, Y. Li, H. Zhang and J. Chen, *J. Mater. Chem. C*, 2022, **10**, 13789–13796.
- [3] P. Yang, K. Liu, Q. Chen, X. Mo, Y. Zhou, S. Li, G. Feng and J. Zhou, *Angew. Chem., Int. Ed.*, 2016, **55**, 12050–12053.
- [4] X. Li, J. Li, T. Wang, S. A. Khan, Z. Yuan, Y. Yin and H. Zhang, *ACS Appl. Mater. Interfaces*, 2022, **14**, 48743–48751.
- [5] Y. Liu, S. Zhang, Y. Zhou, M. A. Buckingham, L. Aldous, P. C. Sherrell, G. G. Wallace, G. Ryder, S. Faisal, D. L. Officer, S. Beirne and J. Chen, *Advanced Energy Materials*, 2020, **10**, 2002539.
